# Supplementary material for: Meiosis I progression in spermatogenesis requires a type of testis-specific 20S core proteasome
Source: PubMed Central journal article supplement (PMC6662770; doi:10.1038/s41467-019-11346-y), 2019-07-29
Supplement: 41467_2019_11346_MOESM3_ESM.pdf [file 41467_2019_11346_MOESM3_ESM.pdf]

## **Description of Additional Supplementary Files**

File Name: Supplementary Data 1

Description: The information of antibodies used.
